# Supplementary material for: Genome-wide identification and expression analysis of the PtrUGT gene family in Populus trichocarpa
Source: Research Square preprint supplement (doi:10.21203/rs.3.rs-7155048/v1), 2025-07-29
Supplement: Supplementary file 1 [file 04ce7a5eca798ea179a32f26.xlsx]

## Sheet: Sheet1
Table S1 List of primer sequences
Primer Name	Application	Primer Sequence（5'-3’）
UGT17-F	qRT-PCR	TGACGGTCTTCCATCATCAGATATTGC
UGT17-R	qRT-PCR	GCACAGCACCTGAGGAGTTGAG
UGT18-F	qRT-PCR	ACGAAGAAGCGAGGCATGTTAGC
UGT18-R	qRT-PCR	GGCACACCAGCACAGATAGAATCC
UGT20-F	qRT-PCR	AGCCAATAGGACCAACAATTCCATCAA
UGT20-R	qRT-PCR	CGAGCCTGGTTCCTTGGAGTCT
UGT25-F	qRT-PCR	TCTAAGGCACAGAGATCAGTTCTTGGA
UGT25-R	qRT-PCR	GGCGACTGTAAGGCTAATTGTGGTT
UGT26-F	qRT-PCR	TGCTCGTGGATTGGTAGATAGTGGT
UGT26-R	qRT-PCR	TCCTCCTCCTCCTCCTCTTCTTCTT
UGT28-F	qRT-PCR	CGGCAATCCAATGTCACTGAGGAA
UGT28-R	qRT-PCR	CATTTCAGGACCCACTTCGCTACC
UGT29-F	qRT-PCR	GTCCACACGATGAGGCTACCAATG
UGT29-R	qRT-PCR	CAAGAAGGCACCACTAGACCAACC
UGT67-F	qRT-PCR	GGTCATAAGAGCAGATAGAGGAGAGGA
UGT67-R	qRT-PCR	ACTTGAGAGCACCACGGCACTA
UGT82-F	qRT-PCR	CTTGTGGGTGGTGATGGATTCTGAG
UGT82-R	qRT-PCR	TTCACTTGAGGACTCCAATTCACTAGC
UGT85-F	qRT-PCR	GCTCGTATCCTGCTTACTTCAAGATGT
UGT85-R	qRT-PCR	ATATTGTATCCACTGCCTCAGCCTCTA
UGT93-F	qRT-PCR	TGATAGTGAGGTGAGGAAGAAGGTGAA
UGT93-R	qRT-PCR	TGGATGAGTTGTGTGATGGAAGTGAAA
UGT106-F	qRT-PCR	GCAGAGACGGCAACGATGTAGAG
UGT106-R	qRT-PCR	CTTGGTAACACTTCAGCAGGCAGAT
UGT108-F	qRT-PCR	TGGAGGAATTGGGAGTGGGAGTG
UGT108-R	qRT-PCR	CTTCATCTTCACACCCGCACCTTT
UGT128-F	qRT-PCR	GTCAGTCACCTTCATTATTCCGACAGA
UGT128-R	qRT-PCR	TTGGCATCTTCAGGGAGGTCACTTA
UGT149-F	qRT-PCR	CCATACACTAGAGCAACTGGTGATGTT
UGT149-R	qRT-PCR	ATCAGCTTCGTCGATTCCTTCTACAAG
UGT198-F	qRT-PCR	AGAGGTGGTAGCGGCAAGAATAG
UGT198-R	qRT-PCR	TCCCATAACTGTTCCTTGGTGAATAGC
SLUGT198-F	Subcellular localization	AACACGGGGGACTTTGCAACatggaggaagcgctagttctgtacc
SLUGT198-R	Subcellular localization	CCTGAAGCGGCCGCTGTACAtttttcatgcttccatgactcaagaagcttgg
