# Supplementary material for: Genome-wide identification and expression analysis of the PtrUGT gene family in Populus trichocarpa
Source: Research Square preprint supplement (doi:10.21203/rs.3.rs-7155048/v1), 2025-07-29
Supplement: Supplementary file 2 [file f984d1081f8dc74e88c81d69.xlsx]

## Sheet: Sheet1
Table S2 The information and physicochemical analysis of PtrUGT gene family
Gene ID	Gene Name	Size(aa)	MW(Da)	Isoelectric Point	Instability Index	Aliphatic Index	Grand Average of Hydropathicity	Number of Transmembrane Proteins
Potri.001G016300.1	PtrUGT1	490	54632.9	5.9	35.25	88.57	-0.099	2
Potri.001G016500.1	PtrUGT2	485	54651.4	6.17	44.49	96.08	-0.055	1
Potri.001G030600.1	PtrUGT3	475	53928.5	5.91	40.85	96.04	-0.072	0
Potri.001G133000.3	PtrUGT4	519	56636	5.98	47.96	80.62	-0.276	0
Potri.001G133100.2	PtrUGT5	428	47285.2	6.47	35.94	81.75	-0.254	0
Potri.001G245900.1	PtrUGT6	451	50787.3	5.62	53.13	85.79	-0.183	0
Potri.001G281800.1	PtrUGT7	462	51530.3	5.85	43.68	93.48	-0.059	0
Potri.001G281900.1	PtrUGT8	463	51913.6	5.89	43.31	88.55	-0.087	0
Potri.001G282100.1	PtrUGT9	459	51816.7	5.2	48.1	94.71	-0.066	0
Potri.001G302300.1	PtrUGT10	486	54613.4	6.63	46.74	87.53	-0.13	0
Potri.001G302400.1	PtrUGT11	491	55914.4	5.91	49.17	90.61	-0.247	0
Potri.001G303000.1	PtrUGT12	485	54560.2	5.81	39.66	79.22	-0.288	0
Potri.001G303100.2	PtrUGT13	453	51426.6	6.87	45.32	88.83	-0.144	0
Potri.001G303300.1	PtrUGT14	483	54109.2	6.18	38	82.96	-0.219	0
Potri.001G303600.1	PtrUGT15	485	54418.2	6.39	38.4	78.64	-0.28	0
Potri.001G303700.1	PtrUGT16	483	54095.2	6.18	38.85	83.17	-0.213	0
Potri.001G312600.1	PtrUGT17	483	53666.8	5.21	39.03	88.22	-0.135	0
Potri.001G313000.1	PtrUGT18	474	53058.1	5.02	39.74	87.43	-0.074	0
Potri.001G348100.1	PtrUGT19	471	52937.7	5.47	36.54	86.31	-0.145	0
Potri.001G389200.1	PtrUGT20	471	52921.4	5.1	48.61	79.68	-0.298	0
Potri.002G098300.1	PtrUGT21	505	56108.5	5.01	46.9	90.71	-0.066	0
Potri.002G098400.1	PtrUGT22	483	53539.3	5.09	41.67	86.58	-0.101	0
Potri.002G123700.1	PtrUGT23	501	56383.8	6.2	38.36	89.18	-0.261	0
Potri.002G162300.1	PtrUGT24	467	52232.9	5.52	38.58	92.31	-0.063	0
Potri.002G168600.1	PtrUGT25	469	51615.1	5.98	45.59	88.72	-0.139	0
Potri.002G236400.1	PtrUGT26	472	52644.8	5.01	41.88	88.39	-0.189	0
Potri.002G236500.2	PtrUGT27	469	52217.5	5.12	38.61	89.59	-0.17	0
Potri.003G100500.1	PtrUGT28	537	58461.9	5.56	47.62	76.63	-0.317	0
Potri.003G138200.1	PtrUGT29	502	55279.5	5.89	44.6	91.04	-0.108	0
Potri.003G184400.2	PtrUGT30	473	53316.2	5.86	45.49	93.13	-0.15	0
Potri.003G210400.1	PtrUGT31	490	55008.5	6.04	38.72	90.37	-0.104	1
Potri.004G069600.1	PtrUGT32	476	52080.1	6.36	40.71	98.7	0.066	0
Potri.004G069700.2	PtrUGT33	362	39961	5.33	35.73	95.88	0.033	0
Potri.004G069800.1	PtrUGT34	476	51842.9	6.36	41.43	100.76	0.082	0
Potri.004G070000.1	PtrUGT35	484	52747.8	6.12	42.54	101.12	0.055	0
Potri.004G070900.1	PtrUGT36	476	52102.1	6.08	42.47	99.94	0.05	0
Potri.004G071000.1	PtrUGT37	476	52042.9	5.98	42.78	101.16	0.062	0
Potri.004G083700.2	PtrUGT38	512	56867.9	5.76	49.08	87.21	-0.171	0
Potri.004G119700.1	PtrUGT39	456	50783.3	5.33	44.23	91.54	-0.07	0
Potri.004G123500.1	PtrUGT40	454	50815.8	5.61	36.35	90.66	-0.067	0
Potri.004G126000.1	PtrUGT41	461	51174	5.58	36.22	97.25	-0.072	0
Potri.004G172700.1	PtrUGT42	481	53691.8	5.54	39.6	90.02	-0.045	0
Potri.004G179300.1	PtrUGT43	463	51989.4	5.71	37.08	85.85	-0.265	0
Potri.004G214100.3	PtrUGT44	480	53637.3	5.92	42.55	83.27	-0.122	0
Potri.005G036100.1	PtrUGT45	492	54672.8	5.32	46.21	90.3	-0.182	0
Potri.005G073766.1	PtrUGT46	479	53725.3	5.1	52.46	81.63	-0.139	0
Potri.005G073800.1	PtrUGT47	479	53725.3	5.1	52.46	81.63	-0.139	0
Potri.006G007000.1	PtrUGT48	484	54381.8	5.47	42.22	91.78	-0.086	0
Potri.006G007100.2	PtrUGT49	303	34469.7	5.34	49.95	89.11	-0.163	0
Potri.006G007200.1	PtrUGT50	484	54495.8	5.19	49.81	93.45	-0.03	0
Potri.006G007300.1	PtrUGT51	484	53457.1	5.01	44.5	96.51	-0.139	0
Potri.006G007350.1	PtrUGT52	487	54446.4	5.18	46.22	89.65	-0.123	0
Potri.006G007400.1	PtrUGT53	483	53781.8	5.13	50.83	90	-0.084	0
Potri.006G007600.2	PtrUGT54	494	55361.7	5.63	34.43	94.45	-0.098	0
Potri.006G010000.1	PtrUGT55	475	52708.3	5.48	33.81	93.24	-0.027	0
Potri.006G022300.1	PtrUGT56	480	53844.8	5.32	34.83	84.94	-0.216	0
Potri.006G022500.1	PtrUGT57	482	54107.2	5.38	34.79	86.8	-0.176	0
Potri.006G022600.1	PtrUGT58	482	54113.3	5.44	35.66	87.01	-0.181	0
Potri.006G022800.2	PtrUGT59	445	49857.4	5.71	41.95	85.19	-0.227	0
Potri.006G023101.1	PtrUGT60	480	53798.9	5.32	37.82	87.77	-0.178	0
Potri.006G023151.1	PtrUGT61	480	53812	5.52	40.54	85.71	-0.159	0
Potri.006G023600.1	PtrUGT62	479	53228.5	5.08	41.48	93.65	0.02	0
Potri.006G023700.1	PtrUGT63	474	52774.3	4.93	45.6	88.65	-0.104	0
Potri.006G039300.2	PtrUGT64	492	55262.6	6.32	42.48	91.32	-0.153	0
Potri.006G047200.1	PtrUGT65	473	52954.4	5.82	50.57	84.12	-0.253	0
Potri.006G048200.1	PtrUGT66	473	52886.5	6.13	48.06	83.89	-0.228	0
Potri.006G055600.1	PtrUGT67	472	51954	5.38	44.98	83.03	-0.221	0
Potri.006G120600.1	PtrUGT68	489	54707.7	8.48	45.33	96.83	-0.09	0
Potri.006G171100.1	PtrUGT69	450	50170.9	5.76	48.11	90.56	-0.083	0
Potri.006G171128.1	PtrUGT70	250	27938.8	8.54	48.9	91.6	-0.054	0
Potri.006G171156.1	PtrUGT71	365	40796.4	5.55	47.38	93.73	-0.028	0
Potri.006G171268.1	PtrUGT72	450	50161.9	6.06	47	90.56	-0.094	0
Potri.006G179700.1	PtrUGT73	465	51103.2	6.03	35.7	96.86	0.06	0
Potri.006G272500.1	PtrUGT74	473	51933.4	5.36	43.35	89.89	-0.078	0
Potri.006G272600.1	PtrUGT75	473	52074.7	5.3	47.11	92.96	-0.052	0
Potri.007G029800.1	PtrUGT76	482	52989.5	6.18	38.51	93.26	0.022	0
Potri.007G030300.1	PtrUGT77	480	52729.1	5.92	39.01	93.06	0.002	0
Potri.007G030400.1	PtrUGT78	481	53034.3	5.51	38.92	97.32	0.018	0
Potri.007G030500.1	PtrUGT79	486	53960.5	5.06	45.11	99.49	0.014	0
Potri.007G049600.1	PtrUGT80	469	52350.1	5.04	43.98	90.58	-0.05	0
Potri.007G095000.1	PtrUGT81	481	54641.9	5.69	43.66	85.55	-0.212	0
Potri.007G117200.1	PtrUGT82	457	50800.4	5.05	46.28	95.71	0.025	0
Potri.007G132400.1	PtrUGT83	478	52706.6	5.7	39.29	88.7	-0.057	0
Potri.007G140300.1	PtrUGT84	457	51458	5.55	41.25	91.86	-0.153	0
Potri.007G140500.1	PtrUGT85	457	51110	5.24	38.76	93.59	-0.063	0
Potri.007G140600.2	PtrUGT86	408	45555.5	5.04	45.06	94.31	-0.002	0
Potri.007G141700.1	PtrUGT87	177	20010.9	6	36.15	72.09	-0.452	0
Potri.007G141900.2	PtrUGT88	252	28282.4	5.11	37.36	86.59	-0.15	0
Potri.008G024900.2	PtrUGT89	440	49859.9	5.48	49.01	102.55	-0.128	0
Potri.007G140500.1	PtrUGT85	457	51110	5.24	38.76	93.59	-0.063	0
Potri.007G140600.2	PtrUGT86	408	45555.5	5.04	45.06	94.31	-0.002	0
Potri.007G141700.1	PtrUGT87	177	20010.9	6	36.15	72.09	-0.452	0
Potri.007G141900.2	PtrUGT88	252	28282.4	5.11	37.36	86.59	-0.15	0
Potri.008G062400.1	PtrUGT90	481	54766.2	6.05	46.35	89.52	-0.163	1
Potri.009G008100.1	PtrUGT91	486	54486.2	5.64	32.28	91.44	-0.099	0
Potri.009G039100.10	PtrUGT92	862	96730	5.84	43.17	76.65	-0.529	0
Potri.009G044600.1	PtrUGT93	471	52423.5	5.25	47.33	95.14	0	0
Potri.009G077200.2	PtrUGT94	459	51210.8	5.48	37.9	94.92	-0.046	0
Potri.009G077400.1	PtrUGT95	460	52426.3	5.7	33.38	89.13	-0.069	0
Potri.009G077500.1	PtrUGT96	461	51699.6	5.68	45.18	99.33	0.085	0
Potri.009G078400.1	PtrUGT97	463	51095.8	5.59	43.97	99.37	0.051	0
Potri.009G095100.1	PtrUGT98	502	56208.4	5.14	44.29	86.37	-0.145	0
Potri.009G095200.1	PtrUGT99	486	54008.3	5.52	45.4	90.25	-0.046	0
Potri.009G095300.1	PtrUGT100	499	55810.3	5.25	42.77	88.62	-0.125	0
Potri.009G095400.1	PtrUGT101	504	56374	5.36	47.25	89.5	-0.112	0
Potri.009G095500.1	PtrUGT102	481	53419.7	5.87	44.33	89.98	-0.07	0
Potri.009G098400.1	PtrUGT103	491	55599.4	6.13	47.7	88.02	-0.214	0
Potri.009G098966.1	PtrUGT104	486	54519.2	5.79	38.02	79.26	-0.297	0
Potri.009G099032.1	PtrUGT105	486	54397.2	5.35	40.93	80.68	-0.234	0
Potri.009G133300.1	PtrUGT106	477	52607.4	5.98	39.87	96.27	0.032	0
Potri.010G084900.1	PtrUGT107	465	52096.8	5.56	39.12	97.7	-0.131	0
Potri.010G137000.1	PtrUGT108	472	51803.6	5.81	34.6	96.44	-0.002	0
Potri.010G182575.1	PtrUGT109	477	53268.2	5.48	42.09	98.53	0.027	0
Potri.010G182650.2	PtrUGT110	260	28929.2	5.07	39.66	97.04	0.023	1
Potri.010G195300.1	PtrUGT111	458	51654.4	6.5	45.25	90.24	-0.102	0
Potri.010G195500.1	PtrUGT112	459	51623.4	6.5	44.4	91.33	-0.087	0
Potri.010G195600.1	PtrUGT113	466	51549.1	5.6	47.29	97.49	-0.007	0
Potri.011G061000.1	PtrUGT114	462	51407.4	6.06	42.68	93.25	-0.018	0
Potri.011G097900.1	PtrUGT115	463	52168.5	5.95	43.88	91.94	-0.029	0
Potri.012G034100.1	PtrUGT116	475	53802.9	5.32	48.13	87.66	-0.17	0
Potri.012G035800.1	PtrUGT117	461	50756.7	5.41	44.16	92.39	0.041	0
Potri.012G036000.2	PtrUGT118	460	50795.8	5.85	43.22	93.24	0.056	0
Potri.012G048700.1	PtrUGT119	486	54526	5.34	44	92.02	-0.043	0
Potri.012G065100.1	PtrUGT120	472	52229.8	6.63	38.46	98.52	0.052	0
Potri.013G022800.1	PtrUGT121	478	52969	5.94	38.39	91.55	-0.141	0
Potri.013G118700.1	PtrUGT122	461	50796.4	6.4	40.64	90.13	0.011	0
Potri.013G143900.1	PtrUGT123	453	50134.8	6.54	41.37	87.62	-0.005	0
Potri.014G026301.1	PtrUGT124	488	54217.1	5.59	38.33	91.5	-0.045	1
Potri.014G041800.1	PtrUGT125	484	52975.2	5.17	38.54	101.53	0.13	0
Potri.014G088400.2	PtrUGT126	509	57613.6	6.29	35.74	92.34	-0.092	0
Potri.014G096000.1	PtrUGT127	465	50489	5.77	36.23	100	-0.025	0
Potri.014G096100.1	PtrUGT128	478	52465.2	5.62	49.25	93.58	-0.093	0
Potri.014G146000.2	PtrUGT129	467	51721.1	5.22	40.66	90.77	-0.132	0
Potri.014G175000.1	PtrUGT130	459	51704	5.24	50.38	82.81	-0.163	0
Potri.015G027700.1	PtrUGT131	477	52884.2	5.62	38.82	98.93	0.079	0
Potri.015G027800.1	PtrUGT132	477	52917	5.4	40.16	96.06	0.046	0
Potri.015G071900.1	PtrUGT133	454	49979.5	5.31	33.61	86.7	-0.05	0
Potri.016G014100.1	PtrUGT134	475	52390.2	5.57	37	91.35	0.003	0
Potri.016G014300.1	PtrUGT135	475	52429.5	5.79	36.87	93.43	0.012	0
Potri.016G014350.1	PtrUGT136	476	52490.4	5.73	38.25	92.21	-0.022	0
Potri.016G014401.2	PtrUGT137	475	52351.3	5.81	37.54	91.37	-0.008	0
Potri.016G014500.1	PtrUGT138	480	52151.8	5.8	37.7	89.71	0.023	0
Potri.016G015700.1	PtrUGT139	474	52093.9	5.44	41.06	94.75	0.026	0
Potri.016G015800.1	PtrUGT140	457	50626.4	5.52	48.31	93.57	0.068	0
Potri.016G016000.2	PtrUGT141	482	53071.1	5.08	49.83	88.57	-0.046	0
Potri.016G016100.1	PtrUGT142	487	54266	5.15	43.92	88.64	-0.142	0
Potri.016G016200.1	PtrUGT143	460	51096.9	6.51	39.08	92.63	-0.124	0
Potri.016G016300.1	PtrUGT144	487	54227.1	5.25	44.63	87.84	-0.139	0
Potri.016G016400.1	PtrUGT145	496	54915.4	5.58	44.87	99.48	-0.023	0
Potri.016G016500.1	PtrUGT146	482	54010.9	5.3	43.87	86.14	-0.193	0
Potri.016G016700.1	PtrUGT147	488	54725.9	6	34.13	89.34	-0.2	0
Potri.016G016800.1	PtrUGT148	498	55245.8	5.86	40.54	92.81	-0.072	0
Potri.016G016900.1	PtrUGT149	473	51992.7	5.02	46.11	95.84	0.04	0
Potri.016G017100.1	PtrUGT150	484	54391.3	5.11	42.17	88	-0.189	0
Potri.016G017166.1	PtrUGT151	362	40311.8	4.83	42.91	83.23	-0.254	1
Potri.016G017232.1	PtrUGT152	481	54026	5.35	47.52	89.54	-0.235	0
Potri.016G017300.1	PtrUGT153	482	53638.2	5.15	42.46	91.37	-0.144	0
Potri.016G017400.1	PtrUGT154	478	53722.5	5.1	49.41	89.96	-0.173	0
Potri.016G018001.1	PtrUGT155	459	51546.1	5.43	42.3	88.32	-0.185	0
Potri.016G019400.1	PtrUGT156	464	52192.8	6.08	42.15	90.11	-0.066	0
Potri.016G020400.1	PtrUGT157	478	53577.5	5.9	43.74	82.24	-0.185	1
Potri.016G020500.1	PtrUGT158	458	50914.3	4.84	43.13	86.03	-0.086	0
Potri.016G020700.1	PtrUGT159	384	43378.2	5.07	44.63	86.33	-0.087	0
Potri.016G020800.3	PtrUGT160	417	46664.8	5.76	45.27	86.79	-0.055	1
Potri.016G020900.1	PtrUGT161	481	53922.9	5.09	46.64	85.34	-0.174	0
Potri.016G021000.3	PtrUGT162	484	54296.4	5.12	44.2	85.19	-0.186	0
Potri.016G021100.1	PtrUGT163	488	54587.7	5.23	41.39	87.3	-0.136	0
Potri.016G021200.1	PtrUGT164	480	53590.3	5.06	41.98	82.69	-0.157	0
Potri.016G021300.1	PtrUGT165	481	53625.3	4.99	46.3	81.91	-0.185	0
Potri.016G021500.1	PtrUGT166	478	53333.6	5.4	42.49	88.49	-0.063	0
Potri.016G021600.2	PtrUGT167	424	47433.6	5.08	42.82	90.61	0.001	0
Potri.016G021700.1	PtrUGT168	480	53564.3	5.06	41.58	82.9	-0.15	0
Potri.016G021800.1	PtrUGT169	481	53541.1	4.91	47.37	81.1	-0.204	0
Potri.016G022000.1	PtrUGT170	478	53301.3	5.23	42.84	88.08	-0.087	0
Potri.016G022100.1	PtrUGT171	478	53439.4	5.13	41.55	89.12	-0.081	0
Potri.016G022400.2	PtrUGT172	478	53391.4	5.19	45.07	87.07	-0.106	0
Potri.016G022500.1	PtrUGT173	479	53808.2	5.26	48.26	94.86	-0.026	0
Potri.016G052500.1	PtrUGT174	471	51942	5.41	51.57	81.32	-0.246	0
Potri.016G057300.1	PtrUGT175	476	53396.8	5.89	44.98	82.33	-0.298	0
Potri.016G097400.1	PtrUGT176	545	60604.4	7.88	42.66	96.37	-0.102	0
Potri.016G105300.1	PtrUGT177	486	54282.1	5.12	46.8	85.66	-0.087	0
Potri.016G105400.1	PtrUGT178	486	54339.3	5.28	45.37	86.46	-0.076	0
Potri.017G032300.2	PtrUGT179	461	51299.7	5.27	41.89	87.66	-0.125	0
Potri.017G032500.1	PtrUGT180	461	50937.3	5.14	44.21	87.03	-0.093	0
Potri.017G032700.1	PtrUGT181	461	50957.3	5.2	42.3	88.31	-0.093	0
Potri.017G032733.1	PtrUGT182	461	50957.3	5.2	42.3	88.31	-0.093	0
Potri.017G041900.1	PtrUGT183	410	45934.1	5.8	50.82	88.46	-0.076	0
Potri.017G042800.1	PtrUGT184	465	52532.5	6.33	53.46	87.25	-0.132	0
Potri.017G052000.1	PtrUGT185	482	54045.9	5.62	37.26	89.77	-0.181	0
Potri.017G052100.1	PtrUGT186	483	54189.2	5.7	38.89	88.78	-0.177	0
Potri.017G052166.1	PtrUGT187	482	53956.2	5.32	44.47	91.24	-0.068	0
Potri.017G052232.1	PtrUGT188	482	54018.8	5.53	36.17	88.15	-0.19	0
Potri.017G052300.1	PtrUGT189	482	54014.2	5.4	44.47	89.63	-0.1	0
Potri.017G052400.1	PtrUGT190	482	54027.8	5.4	37.15	87.34	-0.207	0
Potri.017G077400.1	PtrUGT191	511	56685.8	5.95	53.48	89.51	-0.136	0
Potri.017G077500.1	PtrUGT192	511	56662.8	5.96	51.63	88.75	-0.146	0
Potri.017G077700.1	PtrUGT193	462	51321.6	5.9	53.6	85.5	-0.187	0
Potri.017G077800.1	PtrUGT194	511	56639.6	5.87	52.9	88.75	-0.141	0
Potri.017G089000.1	PtrUGT195	460	50940.8	6.1	37.16	96.85	-0.047	0
Potri.017G091500.1	PtrUGT196	454	51102.7	5.38	32.63	88.02	-0.139	0
Potri.017G101800.1	PtrUGT197	460	51116.2	4.89	43.38	86.7	-0.135	0
Potri.017G150000.1	PtrUGT198	479	53144.2	5.92	44.17	95.85	-0.059	0
Potri.017G150100.1	PtrUGT199	482	53124.1	5.56	36.56	97.12	0.017	0
Potri.018G008900.1	PtrUGT200	471	51822.6	5.92	40.9	93.55	0.006	0
Potri.018G009000.1	PtrUGT201	473	51919.4	5.6	43.59	88.01	-0.111	0
Potri.018G096000.2	PtrUGT202	454	50523.4	5.66	42.52	89.34	-0.1	0
Potri.T010800.1	PtrUGT203	470	51544.8	7.65	42.6	92.38	0.02	0
Potri.T010801.1	PtrUGT204	470	51500.8	8.14	42.16	92.38	0.027	0
